# Supplementary material
Source: MDPI journal article supplement (https://www.mdpi.com/2073-4441/15/24/4297)
Supplement: s1 [file s1]

## Supplementary Materials

**Table S1.** Unimodal benchmark functions.

| Function                                                           | Dim       | Range       | Fmin |
|--------------------------------------------------------------------|-----------|-------------|------|
| $f_1(x) = \sum_{i=1}^n x_i^2$                                      | 30/50/100 | [-100,100]  | 0    |
| $f_2(x) = \sum_{i=1}^n  x_i  + \prod_{i=1}^n  x_i $                | 30/50/100 | [-10,10]    | 0    |
| $f_3(x) = \sum_{i=1}^n (\sum_{j=1}^i x_j)^2$                       | 30/50/100 | [-100,100]  | 0    |
| $f_4(x) = \max\{ x_i , 1 \leq i \leq n\}$                          | 30/50/100 | [-100,100]  | 0    |
| $f_5(x) = \sum_{i=1}^{n-1} [100(x_{i+1} - x_i^2)^2 + (x_i - 1)^2]$ | 30/50/100 | [-30,30]    | 0    |
| $f_6(x) = \sum_{i=1}^n ( x_i + 0.5 )^2$                            | 30/50/100 | [-100,100]  | 0    |
| $f_7(x) = \sum_{i=1}^n i x_i^4 + \text{random}[0,1)$               | 30/50/100 | [1.28,1.28] | 0    |

**Table S2.** Multimodal benchmark functions.

| Function                                                                                                                                                                                 | Dim       | Range         | Fmin        |
|------------------------------------------------------------------------------------------------------------------------------------------------------------------------------------------|-----------|---------------|-------------|
| $f_8(x) = \sum_{i=1}^n -x_i \sin(\sqrt{ x_i })$                                                                                                                                          | 30/50/100 | [-500, 500]   | -418.98*Dim |
| $f_9(x) = \sum_{i=1}^n [x_i^2 - 10 \cos(2\pi x_i) + 10]$                                                                                                                                 | 30/50/100 | [-5.12, 5.12] | 0           |
| $f_{10}(x) = -20 \exp\left(-0.2 \sqrt{\frac{1}{n} \sum_{i=1}^n x_i^2}\right) - \exp\left(\frac{1}{n} \sum_{i=1}^n \cos(2\pi x_i)\right) + 20 + e$                                        | 30/50/100 | [-32, 32]     | 0           |
| $f_{11}(x) = \frac{1}{4000} \sum_{i=1}^n x_i^2 - \prod_{i=1}^n \cos\left(\frac{x_i}{\sqrt{i}}\right) + 1$                                                                                | 30/50/100 | [-600, 600]   | 0           |
| $f_{12}(x) = \frac{\pi}{n} \left\{ 10 \sin^2(\pi y_1) + \sum_{i=1}^{n-1} (y_i - 1)^2 [1 + 10 \sin^2(\pi y_{i+1})] + (y_n - 1)^2 \right\}$<br>$+ \sum_{i=1}^n u(x_i, 10, 100, 4)$         | 30/50/100 | [-50, 50]     | 0           |
| $y_i = 1 + \frac{x_i+1}{4}; u(x_i, a, k, m) = \begin{cases} k(x_i - a)^m, & x_i > a \\ 0, & -a \leq x_i \leq a \\ k(-x_i - a)^m, & x_i < -a \end{cases}$                                 |           |               |             |
| $f_{13}(x) = 0.1 \left\{ \sin^2(3\pi x_1) + \sum_{i=1}^{n-1} (x_i - 1)^2 [1 + \sin^2(3\pi x_{i+1})] + (x_n - 1)^2 [1 + \sin^2(2\pi x_n)] \right\}$<br>$+ \sum_{i=1}^n u(x_i, 5, 100, 4)$ | 30/50/100 | [-50, 50]     | 0           |

**Table S3.** Summary of IEEE CEC'15 functions.

|                                       | No. | Functions                                  | $F_i^*=F_i(x^*)$ |
|---------------------------------------|-----|--------------------------------------------|------------------|
| Unimodal<br>Functions                 | 1   | Rotated High Conditioned Elliptic Function | 100              |
|                                       | 2   | Rotated Cigar Function                     | 200              |
| Simple                                | 3   | Shifted and Rotated Ackley's Function      | 300              |
| Multimodal<br>Functions               | 4   | Shifted and Rotated Rastrigin's Function   | 400              |
|                                       | 5   | Shifted and Rotated Schwefel's Function    | 500              |
| Hybrid<br>Functions                   | 6   | Hybrid Function 1 (N=3)                    | 600              |
|                                       | 7   | Hybrid Function 2 (N=4)                    | 700              |
|                                       | 8   | Hybrid Function 3(N=5)                     | 800              |
| Composition<br>Functions              | 9   | Composition Function 1 (N=3)               | 900              |
|                                       | 10  | Composition Function 2 (N=3)               | 1000             |
|                                       | 11  | Composition Function 3 (N=5)               | 1100             |
|                                       | 12  | Composition Function 4 (N=5)               | 1200             |
|                                       | 13  | Composition Function 5 (N=5)               | 1300             |
|                                       | 14  | Composition Function 6 (N=7)               | 1400             |
|                                       | 15  | Composition Function 7 (N=10)              | 1500             |
| Search Range: [-100,100] <sup>p</sup> |     |                                            |                  |

**Table S4.** Summary of IEEE CEC'17 functions.

|                                       | No. | Functions                                               | $F_i^*=F_i(x^*)$ |
|---------------------------------------|-----|---------------------------------------------------------|------------------|
| Unimodal<br>Functions                 | 1   | Shifted and Rotated Bent Cigar Function                 | 100              |
|                                       | 2   | Shifted and Rotated Sum of Different Power Function*    | 200              |
|                                       | 3   | Shifted and Rotated Zakharov Function                   | 300              |
| Simple<br>Multimodal<br>Functions     | 4   | Shifted and Rotated Rosenbrock's Function               | 400              |
|                                       | 5   | Shifted and Rotated Rastrigin's Function                | 500              |
|                                       | 6   | Shifted and Rotated Expanded Scaffer's F6 Function      | 600              |
|                                       | 7   | Shifted and Rotated Lunacek Bi_Rastrigin Function       | 700              |
|                                       | 8   | Shifted and Rotated Non-Continuous Rastrigin's Function | 800              |
|                                       | 9   | Shifted and Rotated Levy Function                       | 900              |
|                                       | 10  | Shifted and Rotated Schwefel's Function                 | 1000             |
| Hybrid<br>Functions                   | 11  | Hybrid Function 1 (N=3)                                 | 1100             |
|                                       | 12  | Hybrid Function 2 (N=3)                                 | 1200             |
|                                       | 13  | Hybrid Function 2 (N=3)                                 | 1300             |
|                                       | 14  | Hybrid Function 4 (N=4)                                 | 1400             |
|                                       | 15  | Hybrid Function 5 (N=4)                                 | 1500             |
|                                       | 16  | Hybrid Function 6 (N=4)                                 | 1600             |
|                                       | 17  | Hybrid Function 7 (N=5)                                 | 1700             |
|                                       | 18  | Hybrid Function 8 (N=5)                                 | 1800             |
|                                       | 19  | Hybrid Function 9 (N=5)                                 | 1900             |
|                                       | 20  | Hybrid Function 10 (N=6)                                | 2000             |
| Composition<br>Functions              | 21  | Composition Function 1 (N=3)                            | 2100             |
|                                       | 22  | Composition Function 2 (N=3)                            | 2200             |
|                                       | 23  | Composition Function 3 (N=4)                            | 2300             |
|                                       | 24  | Composition Function 4 (N=4)                            | 2400             |
|                                       | 25  | Composition Function 5 (N=5)                            | 2500             |
|                                       | 26  | Composition Function 6 (N=5)                            | 2600             |
|                                       | 27  | Composition Function 7 (N=6)                            | 2700             |
|                                       | 28  | Composition Function 8 (N=6)                            | 2800             |
|                                       | 29  | Composition Function 9 (N=3)                            | 2900             |
|                                       | 30  | Composition Function 10 (N=3)                           | 3000             |
| Search Range: [-100,100] <sup>p</sup> |     |                                                         |                  |

**Table S5.** Results of three algorithms for unimodal benchmark functions (Dim=30/50/100).

| Func     |     | Dim=30   |          |          | Dim=50   |          |          | Dim=100  |          |          |
|----------|-----|----------|----------|----------|----------|----------|----------|----------|----------|----------|
|          |     | GSA      | PSOGS    | IPSOGSA  | GSA      | PSOGS    | IPSOGSA  | GSA      | PSOGS    | IPSOGSA  |
| $f1$     | Mea | 2.05E-17 | 9.22E-18 | 0.00E+00 | 7.32E-17 | 2.81E-17 | 0.00E+00 | 7.42E+01 | 1.14E+03 | 0.00E+00 |
|          | Std | 5.34E-18 | 2.02E-18 | 0.00E+00 | 2.37E-17 | 1.05E-17 | 0.00E+00 | 5.44E+01 | 6.30E+02 | 0.00E+00 |
|          | Ran | 3        | 2        | <b>1</b> | 3        | 2        | <b>1</b> | 2        | 3        | <b>1</b> |
| $f2$     | Mea | 2.32E-08 | 1.47E-08 | 0.00E+00 | 5.43E-08 | 3.12E-08 | 0.00E+00 | 1.10E+00 | 2.04E-03 | 0.00E+00 |
|          | Std | 4.30E-09 | 1.66E-09 | 0.00E+00 | 7.24E-09 | 3.50E-09 | 0.00E+00 | 8.67E-01 | 5.49E-03 | 0.00E+00 |
|          | Ran | 3        | 2        | <b>1</b> | 3        | 2        | <b>1</b> | 3        | 2        | <b>1</b> |
| $f3$     | Mea | 2.51E+02 | 6.21E+02 | 0.00E+00 | 1.03E+03 | 6.17E+03 | 0.00E+00 | 5.03E+03 | 3.98E+04 | 0.00E+00 |
|          | Std | 1.04E+02 | 3.63E+02 | 0.00E+00 | 2.36E+02 | 1.60E+03 | 0.00E+00 | 1.02E+03 | 8.46E+03 | 0.00E+00 |
|          | Ran | 2        | 3        | <b>1</b> | 2        | 3        | <b>1</b> | 2        | 3        | <b>1</b> |
| $f4$     | Mea | 3.44E-09 | 1.09E+00 | 0.00E+00 | 4.14E+00 | 1.52E+01 | 0.00E+00 | 1.08E+01 | 3.11E+01 | 0.00E+00 |
|          | Std | 6.97E-10 | 1.39E+00 | 0.00E+00 | 1.19E+00 | 3.01E+00 | 0.00E+00 | 1.06E+00 | 2.34E+00 | 0.00E+00 |
|          | Ran | 2        | 3        | <b>1</b> | 2        | 3        | <b>1</b> | 2        | 3        | <b>1</b> |
| $f5$     | Mea | 3.36E+01 | 3.93E+01 | 1.30E+01 | 6.17E+01 | 5.02E+01 | 3.83E+01 | 1.83E+03 | 2.11E+02 | 9.19E+01 |
|          | Std | 2.30E+01 | 2.98E+01 | 1.91E+00 | 3.40E+01 | 2.01E+01 | 1.58E+00 | 1.20E+03 | 6.49E+01 | 1.43E+00 |
|          | Ran | 2        | 3        | <b>1</b> | 3        | 2        | <b>1</b> | 3        | 2        | <b>1</b> |
| $f6$     | Mea | 2.26E-17 | 9.01E-18 | 9.07E-18 | 7.08E-17 | 2.67E-17 | 1.04E-16 | 6.86E+01 | 1.34E+03 | 2.39E-03 |
|          | Std | 5.94E-18 | 2.64E-18 | 2.35E-18 | 2.10E-17 | 7.69E-18 | 6.72E-17 | 4.98E+01 | 6.44E+02 | 2.19E-03 |
|          | Ran | 3        | <b>1</b> | 2        | 2        | <b>1</b> | 3        | 2        | 3        | <b>1</b> |
| $f7$     | Mea | 1.93E-02 | 6.42E-03 | 1.16E-04 | 6.33E-02 | 2.20E-02 | 8.25E-05 | 6.10E-01 | 1.85E-01 | 1.10E-04 |
|          | Std | 7.78E-03 | 3.17E-03 | 9.94E-05 | 2.37E-02 | 7.69E-03 | 1.11E-04 | 2.69E-01 | 4.57E-02 | 9.90E-05 |
|          | Ran | 3        | 2        | <b>1</b> | 3        | 2        | <b>1</b> | 3        | 2        | <b>1</b> |
| Avg.Rank |     | 2.57     | 2.29     | 1.14     | 2.57     | 2.14     | 1.29     | 2.43     | 2.57     | 1.00     |
| Fin.Rank |     | 3        | 2        | <b>1</b> | 3        | 2        | <b>1</b> | 2        | 3        | <b>1</b> |

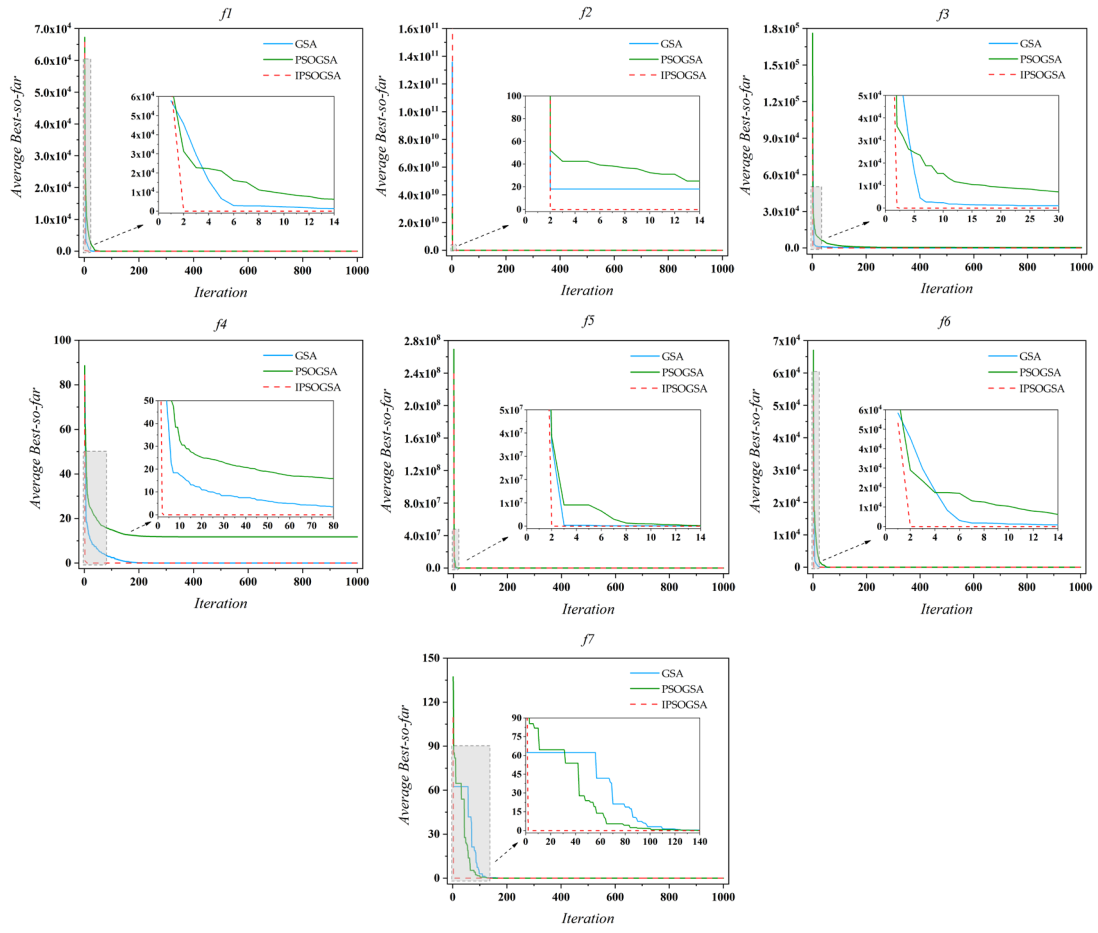

**Figure S1.** Convergence curve for unimodal benchmark functions (Dim=30).

**Table S6.** Results of three algorithms for multimodal benchmark functions  
(Dim=30/50/100).

| Func     |      | Dim=30   |          |          | Dim=50   |          |          | Dim=100  |          |          |
|----------|------|----------|----------|----------|----------|----------|----------|----------|----------|----------|
|          |      | GSA      | PSOGS    | IPSOGSA  | GSA      | PSOGS    | IPSOGSA  | GSA      | PSOGS    | IPSOGSA  |
| $f_8$    | Mean | 9.88E+03 | 6.16E+03 | 1.84E+00 | 8.99E+03 | 2.88E+03 | 2.10E+00 | 7.44E+03 | 5.58E+01 | 2.00E+00 |
|          | Std  | 3.70E+02 | 9.48E+02 | 1.23E+00 | 5.51E+02 | 1.20E+03 | 2.10E+00 | 6.62E+02 | 2.59E+02 | 1.78E+00 |
|          | Rank | 3        | 2        | 1        | 3        | 2        | 1        | 3        | 2        | 1        |
| $f_9$    | Mean | 1.61E+01 | 2.09E+01 | 0.00E+00 | 3.16E+01 | 3.92E+01 | 0.00E+00 | 7.48E+01 | 8.59E+01 | 0.00E+00 |
|          | Std  | 3.62E+00 | 5.88E+00 | 0.00E+00 | 6.48E+00 | 8.66E+00 | 0.00E+00 | 7.87E+00 | 9.26E+00 | 0.00E+00 |
|          | Rank | 2        | 3        | 1        | 2        | 3        | 1        | 2        | 3        | 1        |
| $f_{10}$ | Mean | 3.47E-09 | 2.25E-09 | 8.88E-16 | 4.80E-09 | 3.21E-09 | 8.88E-16 | 1.21E+00 | 9.83E-01 | 8.88E-16 |
|          | Std  | 5.29E-10 | 2.69E-10 | 0.00E+00 | 5.81E-10 | 3.20E-10 | 0.00E+00 | 5.70E-01 | 6.62E-01 | 0.00E+00 |
|          | Rank | 3        | 2        | 1        | 3        | 2        | 1        | 3        | 2        | 1        |
| $f_{11}$ | Mean | 4.05E+00 | 1.89E+00 | 0.00E+00 | 1.85E+01 | 4.55E+01 | 0.00E+00 | 5.56E+01 | 3.28E+02 | 0.00E+00 |
|          | Std  | 1.36E+00 | 1.29E+00 | 0.00E+00 | 4.21E+00 | 1.14E+01 | 0.00E+00 | 7.15E+00 | 3.93E+01 | 0.00E+00 |
|          | Rank | 3        | 2        | 1        | 2        | 3        | 1        | 2        | 3        | 1        |
| $f_{12}$ | Mean | 3.12E-02 | 1.73E-02 | 5.49E-20 | 3.93E-01 | 1.88E+00 | 3.39E-19 | 1.88E+00 | 8.99E+00 | 5.58E-05 |
|          | Std  | 8.14E-02 | 3.86E-02 | 2.59E-20 | 3.23E-01 | 1.08E+00 | 1.33E-19 | 3.66E-01 | 1.74E+00 | 1.92E-04 |
|          | Rank | 3        | 2        | 1        | 2        | 3        | 1        | 2        | 3        | 1        |
| $f_{13}$ | Mean | 7.32E-04 | 8.89E-19 | 2.39E-01 | 3.88E+00 | 1.80E-03 | 5.82E-01 | 6.48E+01 | 1.39E+02 | 6.68E+00 |
|          | Std  | 2.74E-03 | 1.93E-19 | 5.15E-01 | 4.59E+00 | 4.85E-03 | 1.05E+00 | 1.15E+01 | 1.87E+01 | 3.90E+00 |
|          | Rank | 2        | 1        | 3        | 3        | 1        | 2        | 2        | 3        | 1        |
| Avg.Rank |      | 2.67     | 2.00     | 1.33     | 2.50     | 2.33     | 1.17     | 2.33     | 2.67     | 1.00     |
| Fin.Rank |      | 3        | 2        | 1        | 3        | 2        | 1        | 2        | 3        | 1        |

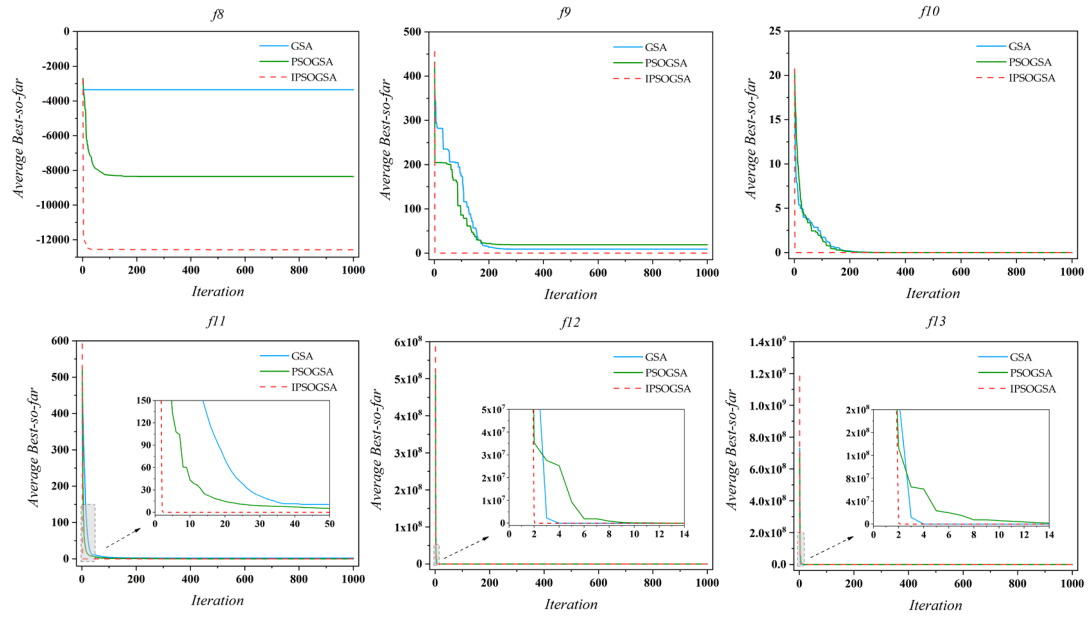

**Figure S2.** Convergence curve for multimodal benchmark functions (Dim=30).



**Table S7.** Comparison on classical benchmark functions.

| Function | Dim=30   |           |          | Dim=50   |           | Dim=100  |           |          |
|----------|----------|-----------|----------|----------|-----------|----------|-----------|----------|
|          | IPSOGSA  | HGSA      | COGSA    | IPSOGSA  | HGSA      | IPSOGSA  | HGSA      | ChOA     |
| F1       | 0.00E+00 | 0.00E+00  | 5.19E-30 | 0.00E+00 | 2.28E-295 | 0.00E+00 | 3.85E-292 | 2.80E-09 |
| F2       | 0.00E+00 | 1.32E-202 | 1.06E-14 | 0.00E+00 | 5.00E-192 | 0.00E+00 | 2.65E-186 | 4.42E+01 |
| F3       | 0.00E+00 | 0.00E+00  | 6.59E-29 | 0.00E+00 | 3.68E-282 | 0.00E+00 | 4.98E-291 | 1.94E+02 |
| F4       | 0.00E+00 | 2.94E-200 | 1.16E-15 | 0.00E+00 | 9.66E-184 | 0.00E+00 | 2.34E-184 | 2.18E+00 |
| F5       | 1.30E+01 | 2.81E+01  | 2.71E+01 | 3.83E+01 | 4.82E+01  | 9.19E+01 | 9.82E+01  | 1.39E+01 |
| F6       | 9.07E-18 | 7.18E-13  | 0.00E+00 | 1.04E-16 | 1.71E-01  | 2.39E-03 | 5.21E+00  | 1.60E-07 |
| F7       | 1.16E-04 | 5.39E-05  | 4.94E-05 | 8.25E-05 | 4.68E-01  | 1.10E-04 | 5.64E-01  | 5.46E-04 |
| F8       | 1.84E+00 | 3.67E+02  | 9.85E+03 | 2.10E+00 | 5.13E+03  | 2.00E+00 | 1.23E+04  | 3.19E+04 |
| F9       | 0.00E+00 | 0.00E+00  | 7.58E-15 | 0.00E+00 | 4.41E-10  | 0.00E+00 | 9.60E-13  | 1.19E+01 |
| F10      | 8.88E-16 | 4.44E-16  | 4.44E-15 | 8.88E-16 | 1.30E-11  | 8.88E-16 | 3.39E-13  | 3.06E-01 |
| F11      | 0.00E+00 | 0.00E+00  | 7.40E-18 | 0.00E+00 | 9.30E-13  | 0.00E+00 | 5.25E-13  | 1.40E-03 |
| F12      | 5.49E-20 | 3.75E-15  | 1.38E-02 | 3.39E-19 | 9.21E-04  | 5.58E-05 | 3.93E-02  | 3.98E-01 |
| F13      | 2.39E-01 | 2.72E+00  | 1.06E-22 | 5.82E-01 | 4.91E+00  | 6.68E+00 | 9.92E+00  | 1.39E-01 |

Green color indicates that the two algorithms perform equally well; Orange color represents that the algorithm outperforms IPSOGSA algorithm.

**Table S8.** Results of three algorithms on CEC 2015 (D=30).

| Function     | GSA             |                 |             | PSOGSA          |                 |             | IPSOGSA         |                 |
|--------------|-----------------|-----------------|-------------|-----------------|-----------------|-------------|-----------------|-----------------|
|              | Mean            | Std             | p-value     | Mean            | Std             | p-value     | Mean            | Std             |
| F1           | 6.86E+05        | 1.29E+05        | 5.15E-10(+) | 9.76E+05        | 1.04E+06        | 5.15E-10(+) | <b>1.38E+02</b> | <b>9.77E+01</b> |
| F2           | <b>5.67E+02</b> | <b>3.59E+02</b> | 1.04E-04(-) | 2.15E+03        | 2.38E+03        | 1.57E-01(=) | 1.33E+03        | 1.30E+03        |
| F3           | <b>3.20E+02</b> | <b>5.71E-05</b> | 5.15E-10(-) | 3.20E+02        | 1.74E-01        | 7.35E-10(-) | 3.21E+02        | 4.84E-02        |
| F4           | 6.27E+02        | 1.43E+01        | 5.15E-10(+) | 5.28E+02        | 2.33E+01        | 5.15E-10(+) | <b>4.14E+02</b> | <b>4.42E+00</b> |
| F5           | 4.49E+03        | <b>3.85E+02</b> | 5.15E-10(+) | 3.85E+03        | 5.78E+02        | 5.15E-10(+) | <b>2.28E+03</b> | 4.28E+02        |
| F6           | 1.32E+05        | 4.04E+04        | 5.15E-10(+) | 5.29E+04        | 5.73E+04        | 5.15E-10(+) | <b>1.97E+03</b> | <b>3.20E+02</b> |
| F7           | 7.16E+02        | 3.73E+00        | 5.15E-10(+) | 7.15E+02        | 9.90E+00        | 5.15E-10(+) | <b>7.05E+02</b> | <b>1.01E+00</b> |
| F8           | 2.01E+04        | 4.05E+03        | 5.15E-10(+) | 3.34E+04        | 1.87E+04        | 5.15E-10(+) | <b>1.41E+03</b> | <b>3.21E+02</b> |
| F9           | 1.00E+03        | 2.19E-01        | 5.15E-10(+) | 1.01E+03        | 4.66E+01        | 1.11E-09(+) | <b>1.00E+03</b> | <b>1.36E-01</b> |
| F10          | 5.34E+05        | 1.22E+05        | 5.15E-10(+) | 2.12E+05        | 5.42E+05        | 5.15E-10(+) | <b>4.77E+03</b> | <b>3.51E+03</b> |
| F11          | <b>1.41E+03</b> | <b>1.25E+00</b> | 6.15E-10(-) | 1.82E+03        | 3.60E+02        | 1.21E-04(+) | 1.62E+03        | 8.37E+01        |
| F12          | 1.30E+03        | <b>4.79E-01</b> | 9.37E-04(+) | 1.31E+03        | 1.54E+00        | 5.15E-10(+) | <b>1.30E+03</b> | 5.66E-01        |
| F13          | 2.20E+03        | 4.84E+02        | 5.15E-10(+) | 1.45E+03        | 1.67E+01        | 5.15E-10(+) | <b>1.42E+03</b> | <b>7.50E+00</b> |
| F14          | <b>1.50E+03</b> | <b>2.54E-08</b> | 5.15E-10(-) | 4.35E+04        | 8.08E+03        | 9.66E-09(+) | 3.27E+04        | 1.80E+03        |
| F15          | 1.60E+03        | 4.91E-11        | 1.00E+00(=) | <b>1.60E+03</b> | <b>3.34E-11</b> | 1.00E+00(=) | 1.60E+03        | 8.60E-11        |
| <i>w/t/l</i> |                 | 10/1/4          |             |                 | 12/2/1          |             |                 |                 |

**Table S9.** Results of three algorithms on CEC 2017 (D=30).

| Function | GSA             |                 |             | PSOGSA          |          |             | IPSOGSA         |                 |
|----------|-----------------|-----------------|-------------|-----------------|----------|-------------|-----------------|-----------------|
|          | Mean            | Std             | p-value     | Mean            | Std      | p-value     | Mean            | Std             |
| F1       | 1.99E+03        | 8.84E+02        | 5.15E-10(+) | 2.89E+03        | 2.83E+03 | 1.12E-07(+) | <b>3.95E+02</b> | <b>2.33E+02</b> |
| F2       | 2.60E+10        | 4.49E+10        | 5.15E-10(+) | 1.61E+08        | 1.10E+09 | 1.74E-02(+) | <b>2.00E+02</b> | <b>4.96E-06</b> |
| F3       | 7.49E+04        | 4.97E+03        | 5.15E-10(+) | 9.19E+03        | 6.12E+03 | 5.15E-10(+) | <b>3.00E+02</b> | <b>0.00E+00</b> |
| F4       | 5.33E+02        | <b>1.31E+01</b> | 5.15E-10(+) | 5.27E+02        | 4.48E+01 | 2.42E-06(+) | <b>4.81E+02</b> | 3.38E+01        |
| F5       | 7.15E+02        | 1.68E+01        | 5.15E-10(+) | 6.28E+02        | 2.22E+01 | 5.15E-10(+) | <b>5.14E+02</b> | <b>4.98E+00</b> |
| F6       | 6.46E+02        | 3.96E+00        | 5.15E-10(+) | 6.22E+02        | 9.18E+00 | 5.15E-10(+) | <b>6.00E+02</b> | <b>1.34E-02</b> |
| F7       | 7.51E+02        | <b>4.56E+00</b> | 2.31E-06(+) | 8.11E+02        | 1.91E+01 | 5.15E-10(+) | <b>7.44E+02</b> | 6.12E+00        |
| F8       | 9.48E+02        | 1.02E+01        | 5.15E-10(+) | 9.07E+02        | 2.14E+01 | 5.15E-10(+) | <b>8.14E+02</b> | <b>3.48E+00</b> |
| F9       | 1.78E+03        | 2.80E+02        | 5.15E-10(+) | 3.25E+03        | 1.02E+03 | 5.15E-10(+) | <b>9.00E+02</b> | <b>1.07E-01</b> |
| F10      | 4.73E+03        | <b>3.15E+02</b> | 5.15E-10(+) | 4.83E+03        | 6.29E+02 | 7.80E-10(+) | <b>3.26E+03</b> | 4.67E+02        |
| F11      | <b>1.19E+03</b> | <b>2.27E+01</b> | 2.45E-02(-) | 1.24E+03        | 4.45E+01 | 3.89E-03(+) | 1.21E+03        | 3.47E+01        |
| F12      | 5.08E+05        | 1.65E+05        | 5.15E-10(+) | 6.91E+05        | 3.02E+06 | 5.15E-10(+) | <b>9.16E+03</b> | <b>4.63E+03</b> |
| F13      | 2.83E+04        | <b>4.92E+03</b> | 5.15E-10(+) | 1.76E+04        | 1.20E+04 | 1.10E-05(+) | <b>7.80E+03</b> | 5.09E+03        |
| F14      | 9.05E+04        | 2.75E+04        | 5.15E-10(+) | 1.51E+04        | 3.69E+04 | 5.15E-10(+) | <b>1.51E+03</b> | <b>2.43E+01</b> |
| F15      | 9.25E+03        | 1.36E+03        | 5.15E-10(+) | 5.29E+03        | 3.76E+03 | 7.32E-09(+) | <b>1.95E+03</b> | <b>4.17E+02</b> |
| F16      | 3.05E+03        | 2.60E+02        | 5.15E-10(+) | 2.77E+03        | 2.83E+02 | 5.46E-10(+) | <b>2.16E+03</b> | <b>1.48E+02</b> |
| F17      | 2.86E+03        | 1.70E+02        | 5.15E-10(+) | 2.25E+03        | 2.64E+02 | 1.25E-09(+) | <b>1.86E+03</b> | <b>6.75E+01</b> |
| F18      | 1.67E+05        | 4.83E+04        | 5.15E-10(+) | 1.17E+05        | 7.03E+04 | 5.15E-10(+) | <b>2.19E+03</b> | <b>5.22E+02</b> |
| F19      | 6.20E+03        | 1.02E+03        | 1.05E-09(+) | 9.52E+03        | 7.63E+03 | 8.13E-06(+) | <b>3.73E+03</b> | <b>1.00E+03</b> |
| F20      | 3.01E+03        | 1.83E+02        | 5.15E-10(+) | 2.67E+03        | 1.92E+02 | 5.80E-10(+) | <b>2.22E+03</b> | <b>1.08E+02</b> |
| F21      | 2.52E+03        | 1.84E+01        | 5.15E-10(+) | 2.42E+03        | 2.97E+01 | 5.15E-10(+) | <b>2.32E+03</b> | <b>6.18E+00</b> |
| F22      | 4.30E+03        | 2.32E+03        | 4.01E-05(+) | 3.63E+03        | 2.10E+03 | 6.55E-04(+) | <b>2.30E+03</b> | <b>5.24E-10</b> |
| F23      | 3.45E+03        | 1.05E+02        | 5.15E-10(+) | 3.03E+03        | 8.65E+01 | 5.15E-10(+) | <b>2.67E+03</b> | <b>1.12E+01</b> |
| F24      | 3.17E+03        | 4.47E+01        | 5.15E-10(+) | 3.20E+03        | 9.20E+01 | 5.15E-10(+) | <b>2.84E+03</b> | <b>1.02E+01</b> |
| F25      | 2.93E+03        | 9.00E+00        | 5.15E-10(+) | 2.91E+03        | 2.08E+01 | 1.40E-09(+) | <b>2.88E+03</b> | <b>4.80E+00</b> |
| F26      | 4.46E+03        | 1.80E+03        | 6.25E-04(+) | 5.70E+03        | 1.56E+03 | 1.25E-08(+) | <b>3.24E+03</b> | <b>5.01E+02</b> |
| F27      | 4.05E+03        | 2.50E+02        | 5.15E-10(+) | 3.50E+03        | 9.96E+01 | 5.15E-10(+) | <b>3.20E+03</b> | <b>4.72E-05</b> |
| F28      | 3.22E+03        | 2.68E+01        | 5.46E-10(-) | <b>3.14E+03</b> | 5.85E+01 | 5.14E-10(-) | 3.30E+03        | <b>9.88E-03</b> |
| F29      | 4.51E+03        | 1.96E+02        | 5.15E-10(+) | 4.08E+03        | 2.07E+02 | 5.15E-10(+) | <b>3.47E+03</b> | <b>1.23E+02</b> |
| F30      | 4.58E+04        | 5.24E+03        | 5.15E-10(+) | 2.53E+04        | 1.03E+04 | 5.15E-10(+) | <b>7.92E+03</b> | <b>2.14E+03</b> |
| w/t/l    |                 | 28/0/2          |             |                 | 29/0/1   |             |                 |                 |

**Table S10.** Comparison on CEC 2017 (D=30)

| Function | IPSOGSA  | GPSG<br>(2022) | SSC<br>(2021) | ESA<br>(2021) | HFPSO<br>(2018) |
|----------|----------|----------------|---------------|---------------|-----------------|
| F1       | 3.95E+02 | 5.36E+02       | 6.09E+03      | 1.61E+04      | 1.49E+09        |
| F2       | 2.00E+02 |                | 8.53E+03      | 6.80E+05      | 4.29E+30        |
| F3       | 3.00E+02 | 2.20E+04       | 9.13E+03      | 6.30E+02      | 1.32E+05        |
| F4       | 4.81E+02 | 4.02E+02       | 8.43E+03      | 4.35E+02      | 6.81E+02        |
| F5       | 5.14E+02 | 5.55E+02       | 1.65E+04      | 5.14E+02      | 7.44E+02        |
| F6       | 6.00E+02 | 6.03E+02       | 8.73E+03      | 2.75E+03      | 6.55E+02        |
| F7       | 7.44E+02 | 7.41E+02       | 8.78E+04      | 1.41E+03      | 1.06E+03        |
| F8       | 8.14E+02 | 8.46E+02       | 1.88E+05      | 8.16E+02      | 1.02E+03        |
| F9       | 9.00E+02 | 9.00E+02       | 1.41E+05      | 2.00E+03      | 9.04E+03        |
| F10      | 3.26E+03 | 3.19E+03       | 2.18E+05      | 2.33E+03      | 7.50E+03        |
| F11      | 1.21E+03 | 1.16E+03       | 1.84E+05      | 1.11E+03      | 2.29E+03        |
| F12      | 9.16E+03 | 1.13E+05       | 1.18E+06      | 2.60E+03      | 5.95E+07        |
| F13      | 7.80E+03 | 2.01E+04       | 1.42E+06      | 1.31E+03      | 5.07E+06        |
| F14      | 1.51E+03 | 2.07E+03       | 1.32E+06      | 4.72E+03      | 6.63E+05        |
| F15      | 1.95E+03 | 1.03E+04       | 1.03E+04      | 3.20E+03      | 7.35E+04        |
| F16      | 2.16E+03 | 2.06E+03       | 2.20E+03      | 2.52E+05      | 3.20E+03        |
| F17      | 1.86E+03 | 1.76E+03       | 2.53E+03      | 7.70E+06      | 2.30E+03        |
| F18      | 2.19E+03 | 4.39E+04       | 2.68E+03      | 2.22E+03      | 2.60E+06        |
| F19      | 3.73E+03 | 1.90E+04       | 2.70E+03      | 2.41E+03      | 5.95E+05        |
| F20      | 2.22E+03 | 2.21E+03       | 7.11E+03      | 2.12E+03      | 2.77E+03        |
| F21      | 2.32E+03 | 2.34E+03       | 2.61E+03      | 5.15E+03      | 2.51E+03        |
| F22      | 2.30E+03 | 2.30E+03       | 1.56E+04      | 3.00E+03      | 5.80E+03        |
| F23      | 2.67E+03 | 2.72E+03       | 1.69E+04      | 4.77E+03      | 2.96E+03        |
| F24      | 2.84E+03 | 2.86E+03       | 2.12E+05      | 2.24E+04      | 3.17E+03        |
| F25      | 2.88E+03 | 2.89E+03       | 1.37E+04      | 2.72E+03      | 3.06E+03        |
| F26      | 3.24E+03 | 2.80E+03       | 1.39E+04      | 3.65E+03      | 5.66E+03        |
| F27      | 3.20E+03 | 3.22E+03       | 1.05E+05      | 2.57E+04      | 3.32E+03        |
| F28      | 3.30E+03 | 3.10E+03       | 1.55E+05      | 5.58E+04      | 3.39E+03        |
| F29      | 3.47E+03 | 3.60E+03       | 1.14E+05      | 3.22E+03      | 4.42E+03        |
| F30      | 7.92E+03 | 3.71E+04       | 1.03E+04      | 2.90E+04      | 4.61E+06        |

Green color indicates that the two algorithms perform equally well; Orange color represents that the algorithm outperforms IPSOGSA algorithm.

**Table S11.** Environmental quality standards for surface water of China

| Standard value     | class | I          | II  | III | IV  | V   |
|--------------------|-------|------------|-----|-----|-----|-----|
|                    |       | Indicators |     |     |     |     |
| COD <sub>Mn</sub>  |       | 2          | 4   | 6   | 10  | 15  |
| ≤                  |       |            |     |     |     |     |
| NH <sub>3</sub> -N |       | 0.15       | 0.5 | 1.0 | 1.5 | 2.0 |
| ≤                  |       |            |     |     |     |     |
| TP                 | ≤     | 0.02       | 0.1 | 0.2 | 0.3 | 0.4 |
